# Supplementary material
Source: Research Square preprint supplement (doi:10.21203/rs.3.rs-9472829/v1)
Supplement: Supplementary file 1 [file b843559ced83b83516ba757e.docx]

**Graphical abstract**
