# Supplementary material
Source: Research Square preprint supplement (doi:10.21203/rs.3.rs-9472829/v1)
Supplement: Supplementary file 2 [file de8901c651241f448c1b2ce5.docx]

**Table 1.** Compound 1303 and virtual screening hits DR1-DR4.

| Compounds | Structure | Name | PubChem CID | RTMScore a |
| --- | --- | --- | --- | --- |
| 1303 |  | 5-N-[[4-methyl-6-[(8S)-8-methyl-3-(trifluoromethyl)-6,8-dihydro-5H-[1,2,4]triazolo[4,3-a]pyrazin-7-yl]-3-pyridinyl]methyl]isoquinoline-1,5-diamine | 169100196 | 46.10 |
| DR1 |  | N-[1-hydroxy-3-(1H-indol-3-yl)propan-2-yl]-2-[5-(phenoxymethyl)tetrazol-2-yl]acetamide | 166196011 | 57.97 |
| DR2 |  | N-(6-methyl-2-pyridin-2-ylpyrimidin-4-yl)-1H-indazol-5-amine | 132345125 | 55.92 |
| DR3 |  | 3-((2-carbamoylphenoxy)methyl)-N-(4,5-dihydrothiazol-2-yl)benzamide | 11610072 | 54.21 |
| DR4 |  | N-(2,6-dioxaspiro[4.5]decan-9-yl)-2-(4-oxo-3H-phthalazin-1-yl)acetamide | 166196143 | 53.83 |

a Docking scores calculated by the RTMScore function; higher values indicate more favorable predicted binding affinity.
