# Supplementary material
Source: Research Square preprint supplement (doi:10.21203/rs.3.rs-9472829/v1)
Supplement: Supplementary file 3 [file fc4cd979f229b8fed4c4f54f.docx]

**SUPPORTING INFORMATION**

**Deep Learning-Guided High-Throughput Screening and Molecular Dynamics Simulations Facilitate the Discovery of Potential FXIIa inhibitors**

Fengze Caia,#, Wanjun Chena,#, Song Xiea, Juhong Wua, Yongqi Zhanga, Ping Gaoa, Han Zhanga,*, Jinyu Lia,b,*

a College of Chemistry, Fuzhou University, 350116 Fuzhou, China

b College of Biological and Pharmaceutical Engineering, Jilin Agricultural Science and Technology University, 132101 Jilin, China

# These authors contributed equally to this work

* Corresponding author: Li, J., +86 591 2286 7607, [j.li@fzu.edu.cn](mailto:j.li@fzu.edu.cn)

* Corresponding author: Zhang, H.+86 156 8105 3768, [hzhang9710@163.com](mailto:hzhang9710@163.comn)

**Figure S1.** (a) The crystal structure of FXIIa in complex with benzamidine (PDB ID: 6B74). (b) Representative conformation of apo-FXIIa from a 1 μs all-atom molecular dynamics simulation. (c) RMSD of apo-FXIIa from three independent 1 μs all-atom molecular dynamics simulations. (d) Time evolution of the average RMSD for apo-FXIIa. Solid lines: mean of three independent repeats; shaded areas: standard deviation.

**Figure S2.** RMSD plots of protein backbone atoms and ligand heavy atoms in the MD simulations of FXIIa in complex with DR2 (a), DR4 (b).

**Figure S3.** Average backbone RMSD for the three parallel MD simulations of FXIIa in complex with 1303 (a), DR1 (b), DR2 (c), DR3 (d), and DR4(e). The average values and their standard deviations are shown solid lines and shaded areas, respectively.

**Figure S4.** Center-of-mass (COM) distance between the FXIIa backbone atoms and DR2 (a) and DR4 (b) in MD simulations.

**Figure S5.** The Rg (a), SASA (b), Intermolecular hydrogen bonds (c), occupancy of secondary structural elements (d) and RMSF (e) of apo-FXIIa and FXIIa in complex with 1303 and DR1-DR4 during MD simulations.

**Figure S6.** The most representative structures of FXIIa bound to DR2 and DR4 in MD simulations. (a-b) Cartoon representations of FXIIa-DR2 (a) and FXIIa-DR4 (b) complexes. (c-d): Binding modes of FXIIa to DR2 (c) and DR4 (d). Hydrogen bonds and π–π stacking are indicated by black and red dashed lines, respectively.


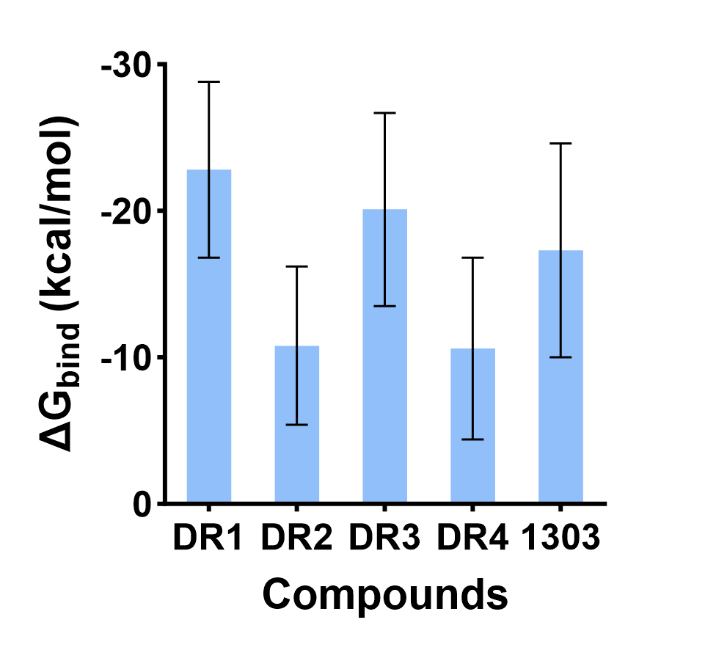


**Figure S7.** Binding free energy (Δ*G*bind) of compounds 1303 and DR1-DR4 to FXIIa.
